# Supplementary material
Source: PubMed Central journal article supplement (PMC8153085)

## Supplementary Figure S1

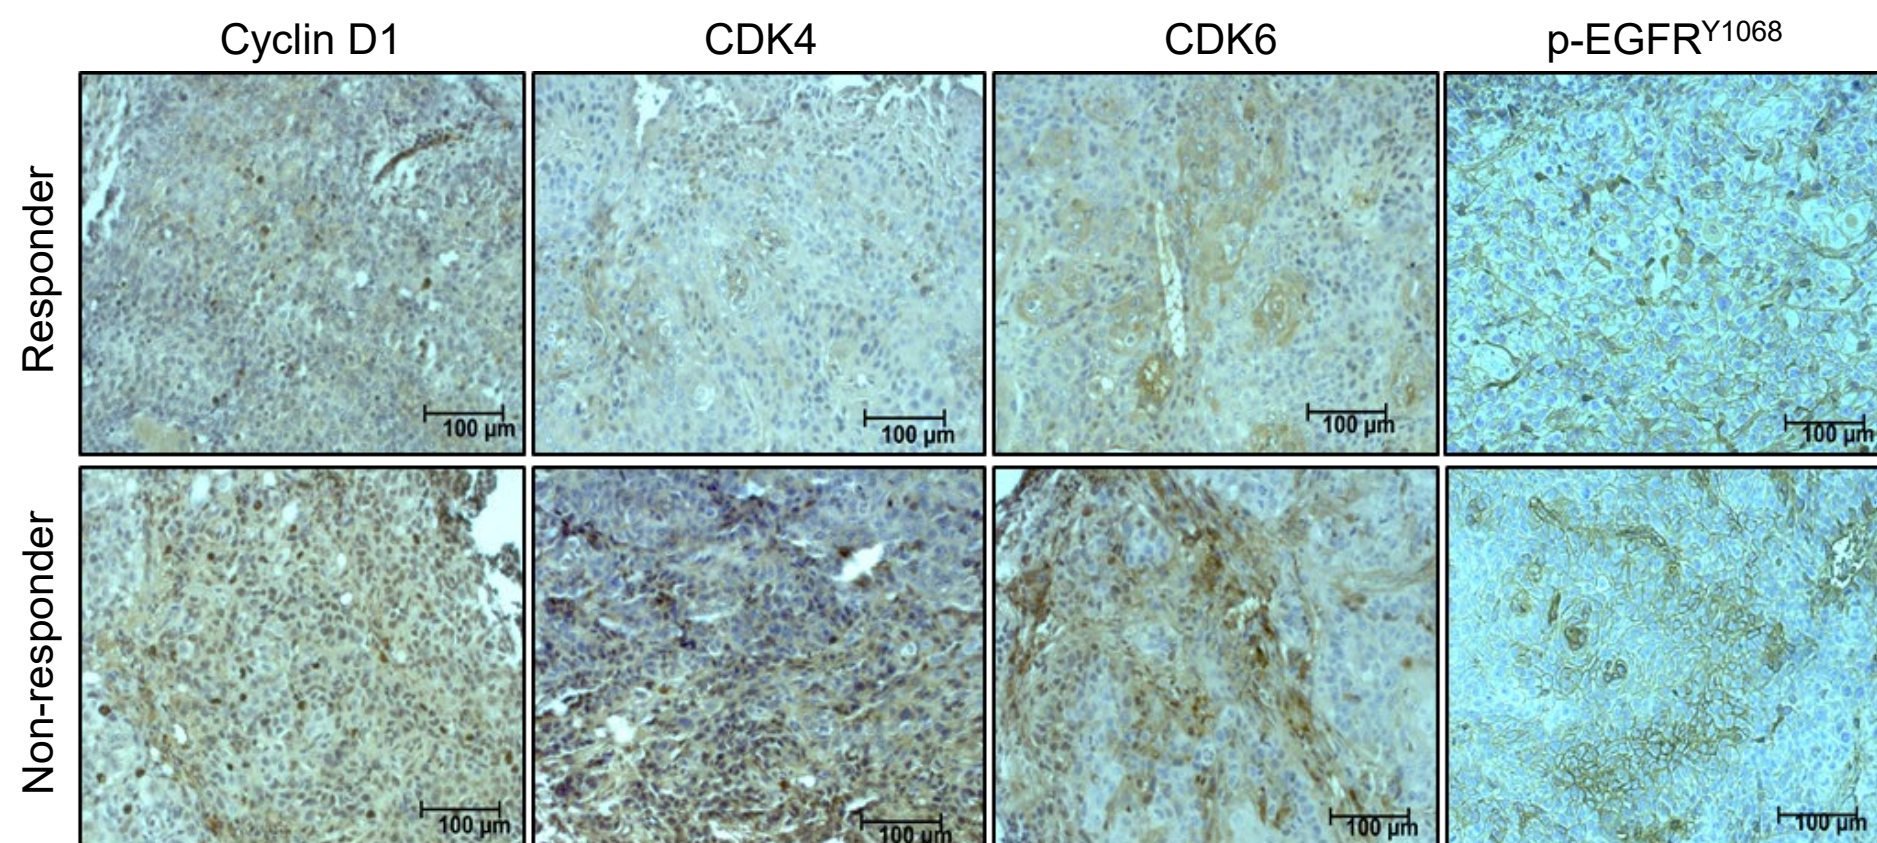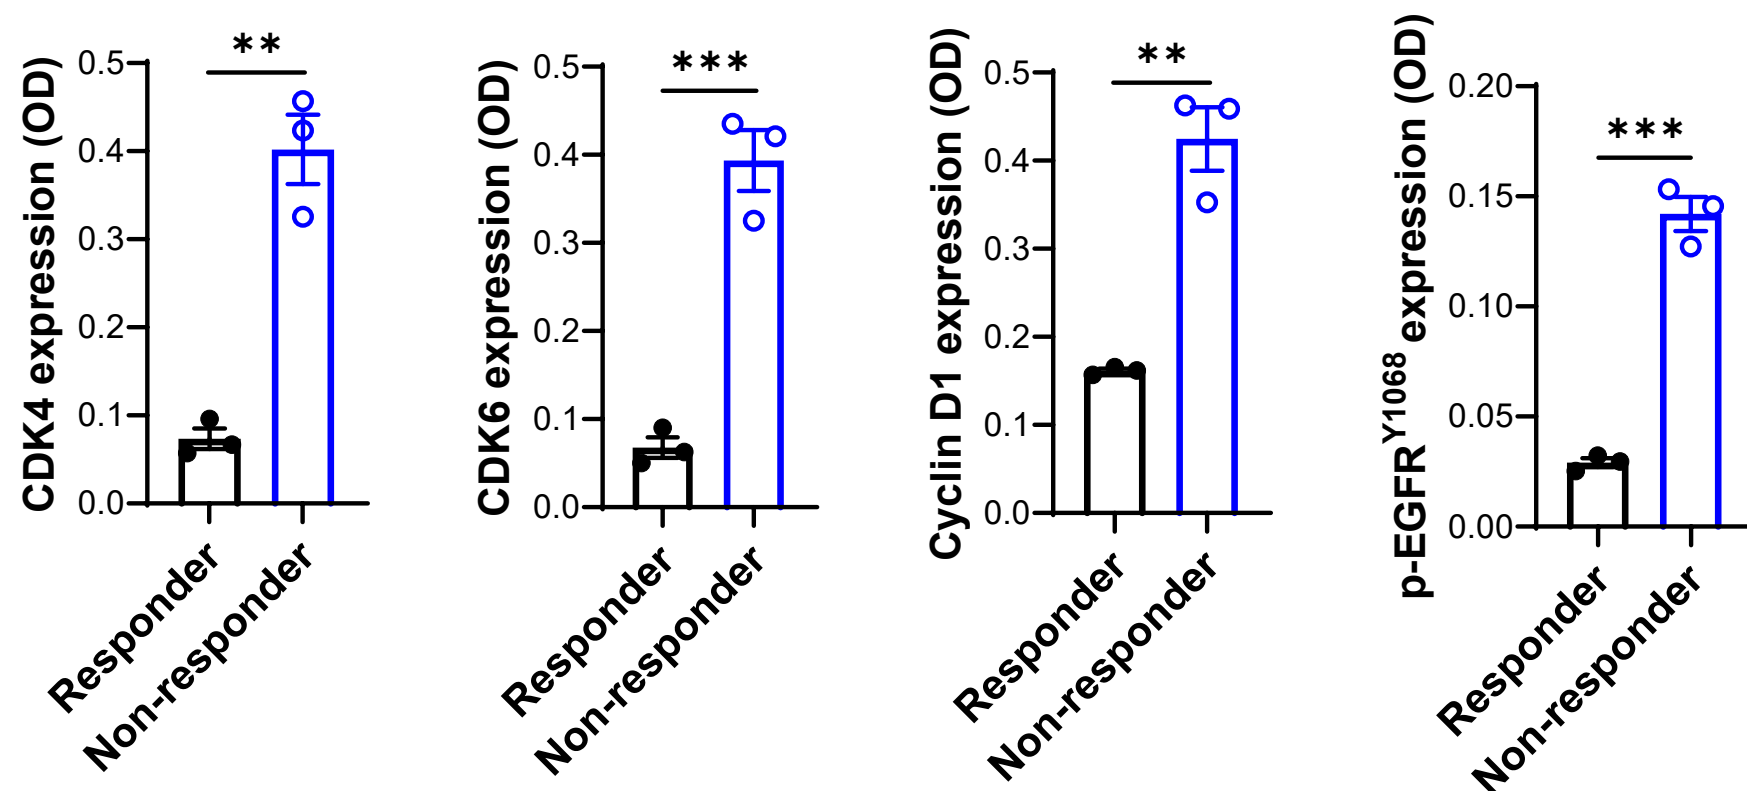

Supplement: NIHMS1700660-supplement-1.pdf [file NIHMS1700660-supplement-1.pdf]

# Supplementary Figure S3

**Cyclin D1 co-expressed gene network**

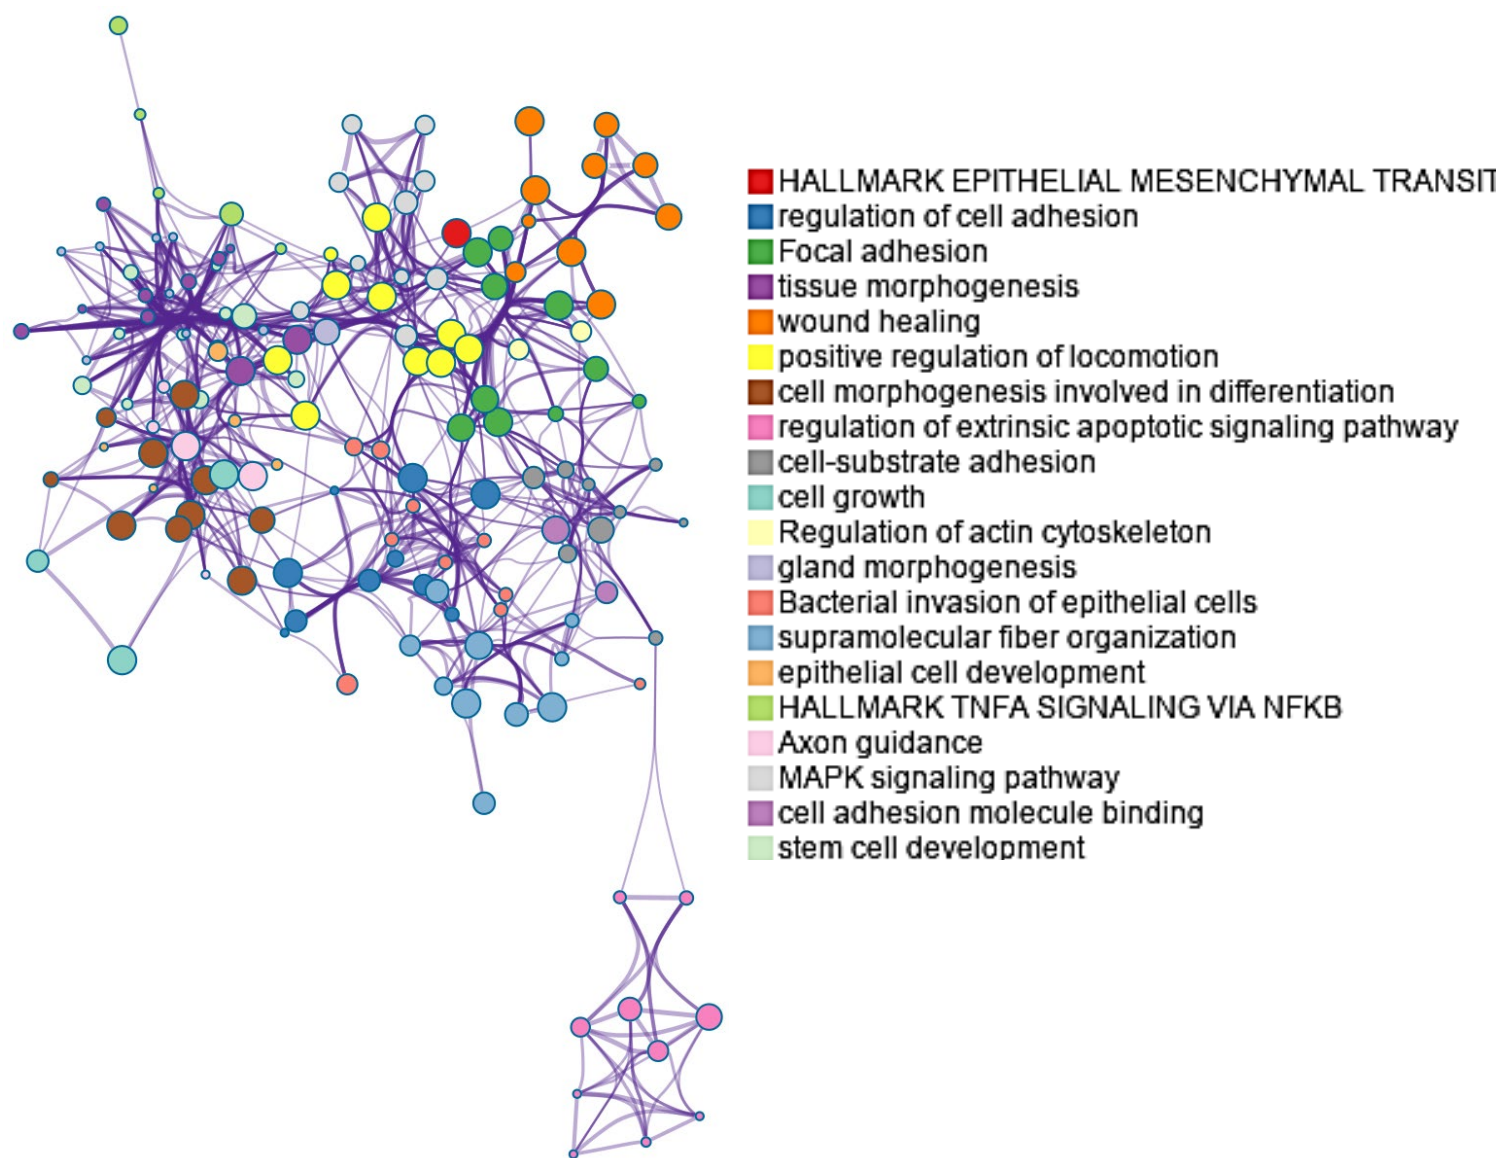

**EGFR co-expressed gene network**

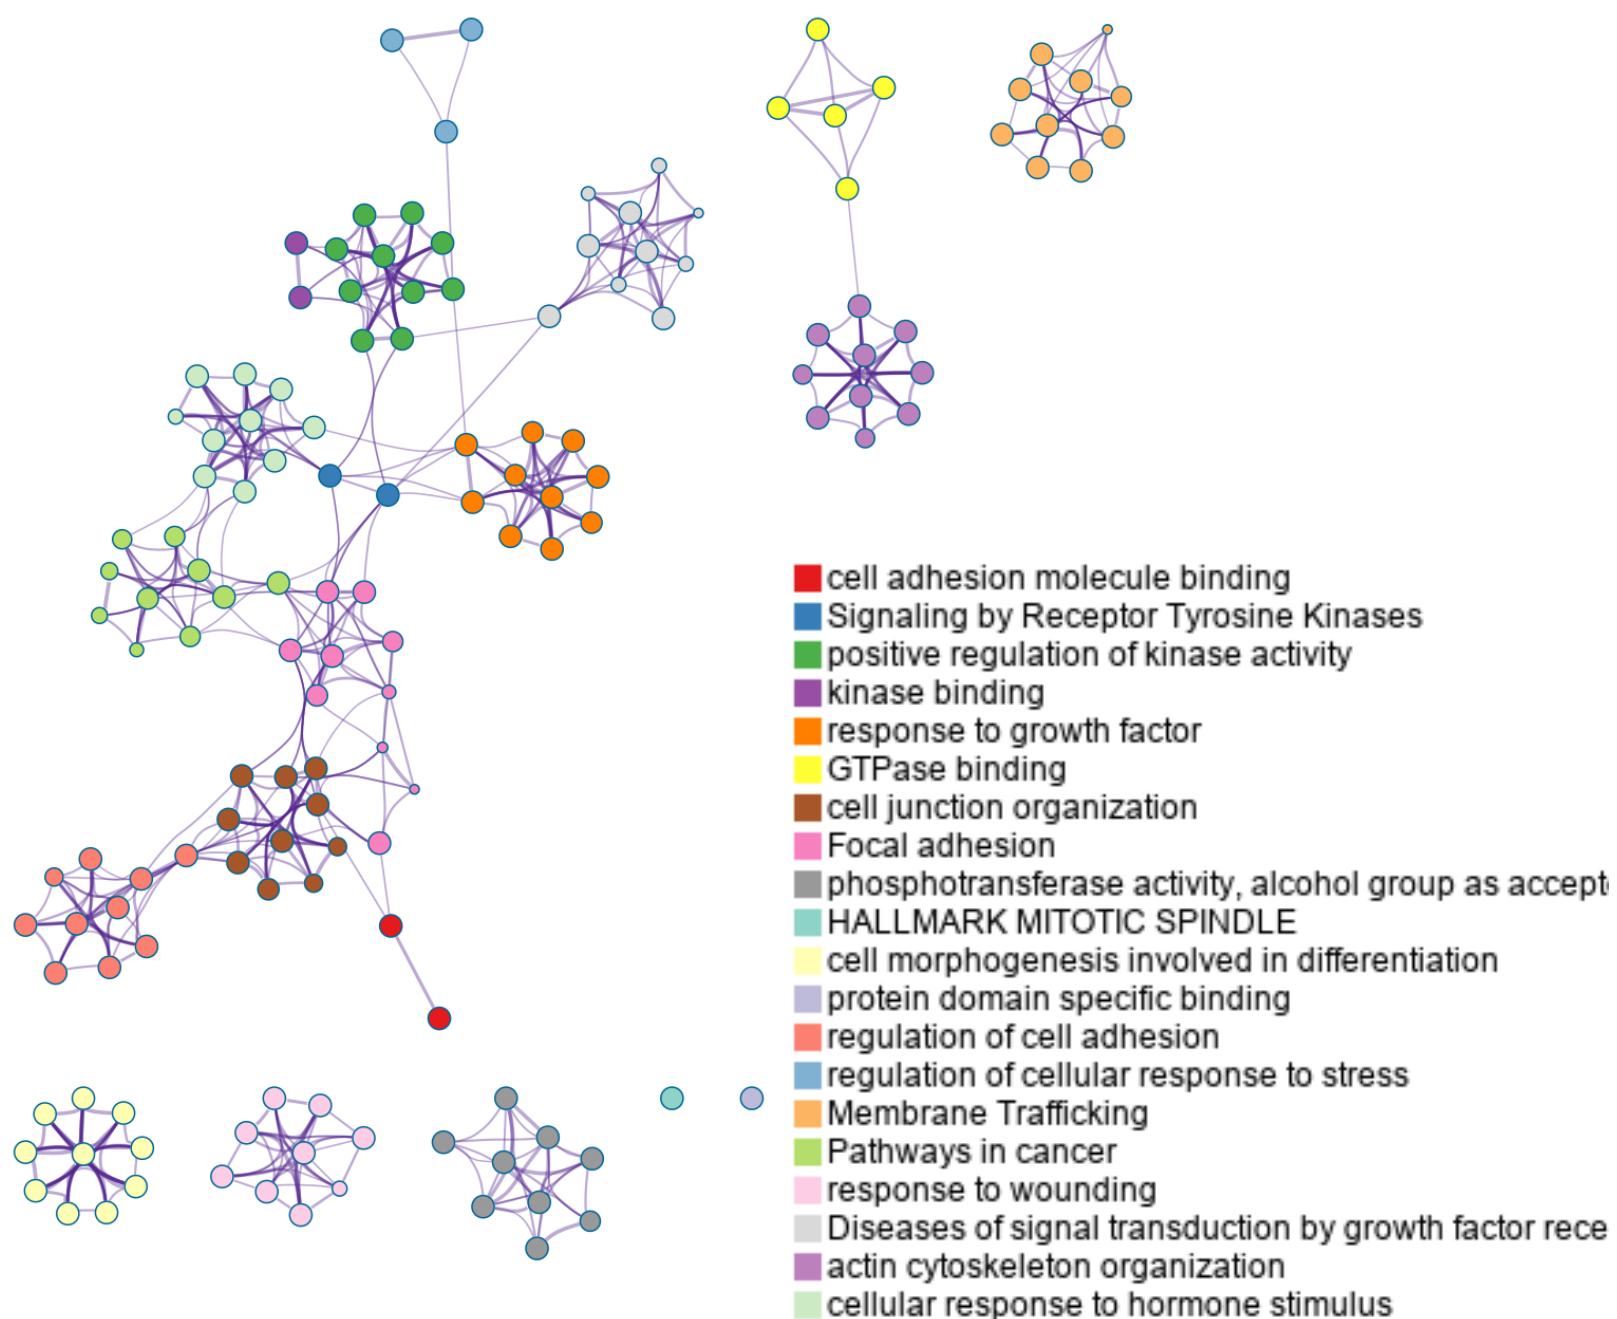

Supplement: NIHMS1700660-supplement-3.pdf [file NIHMS1700660-supplement-3.pdf]

# Supplementary Figure S4

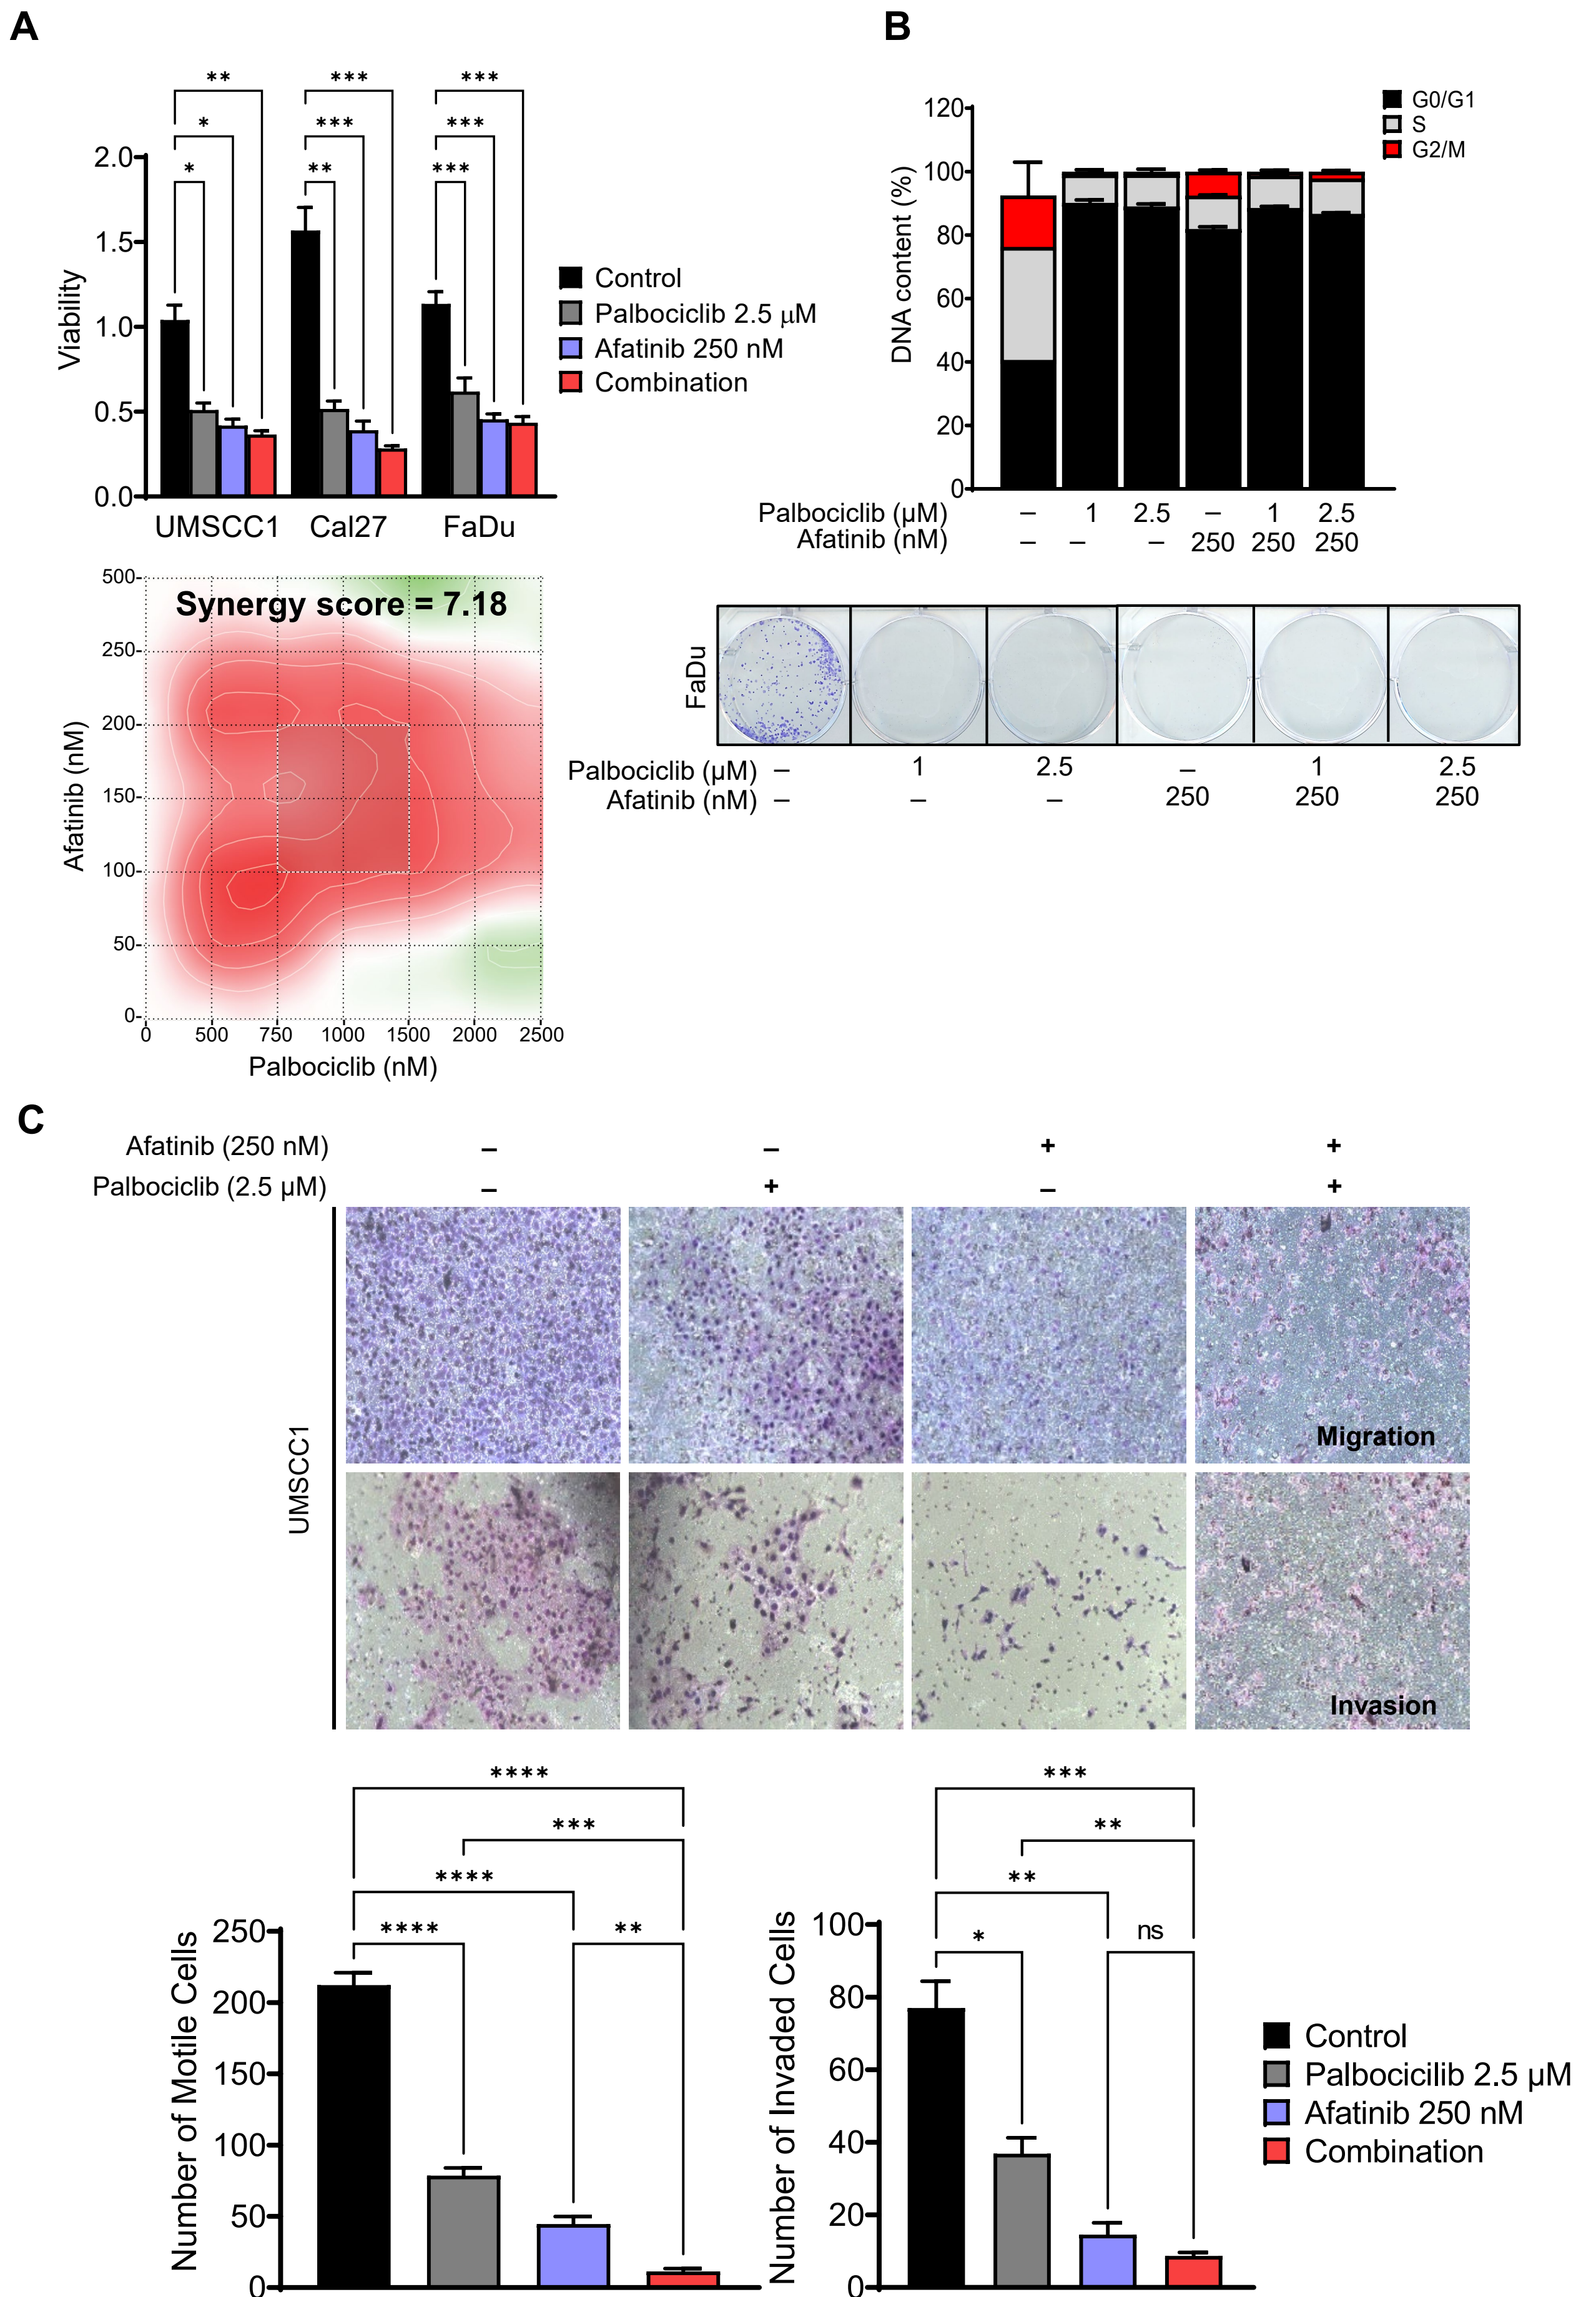

Supplement: NIHMS1700660-supplement-4.pdf [file NIHMS1700660-supplement-4.pdf]

# Supplementary Figure S5

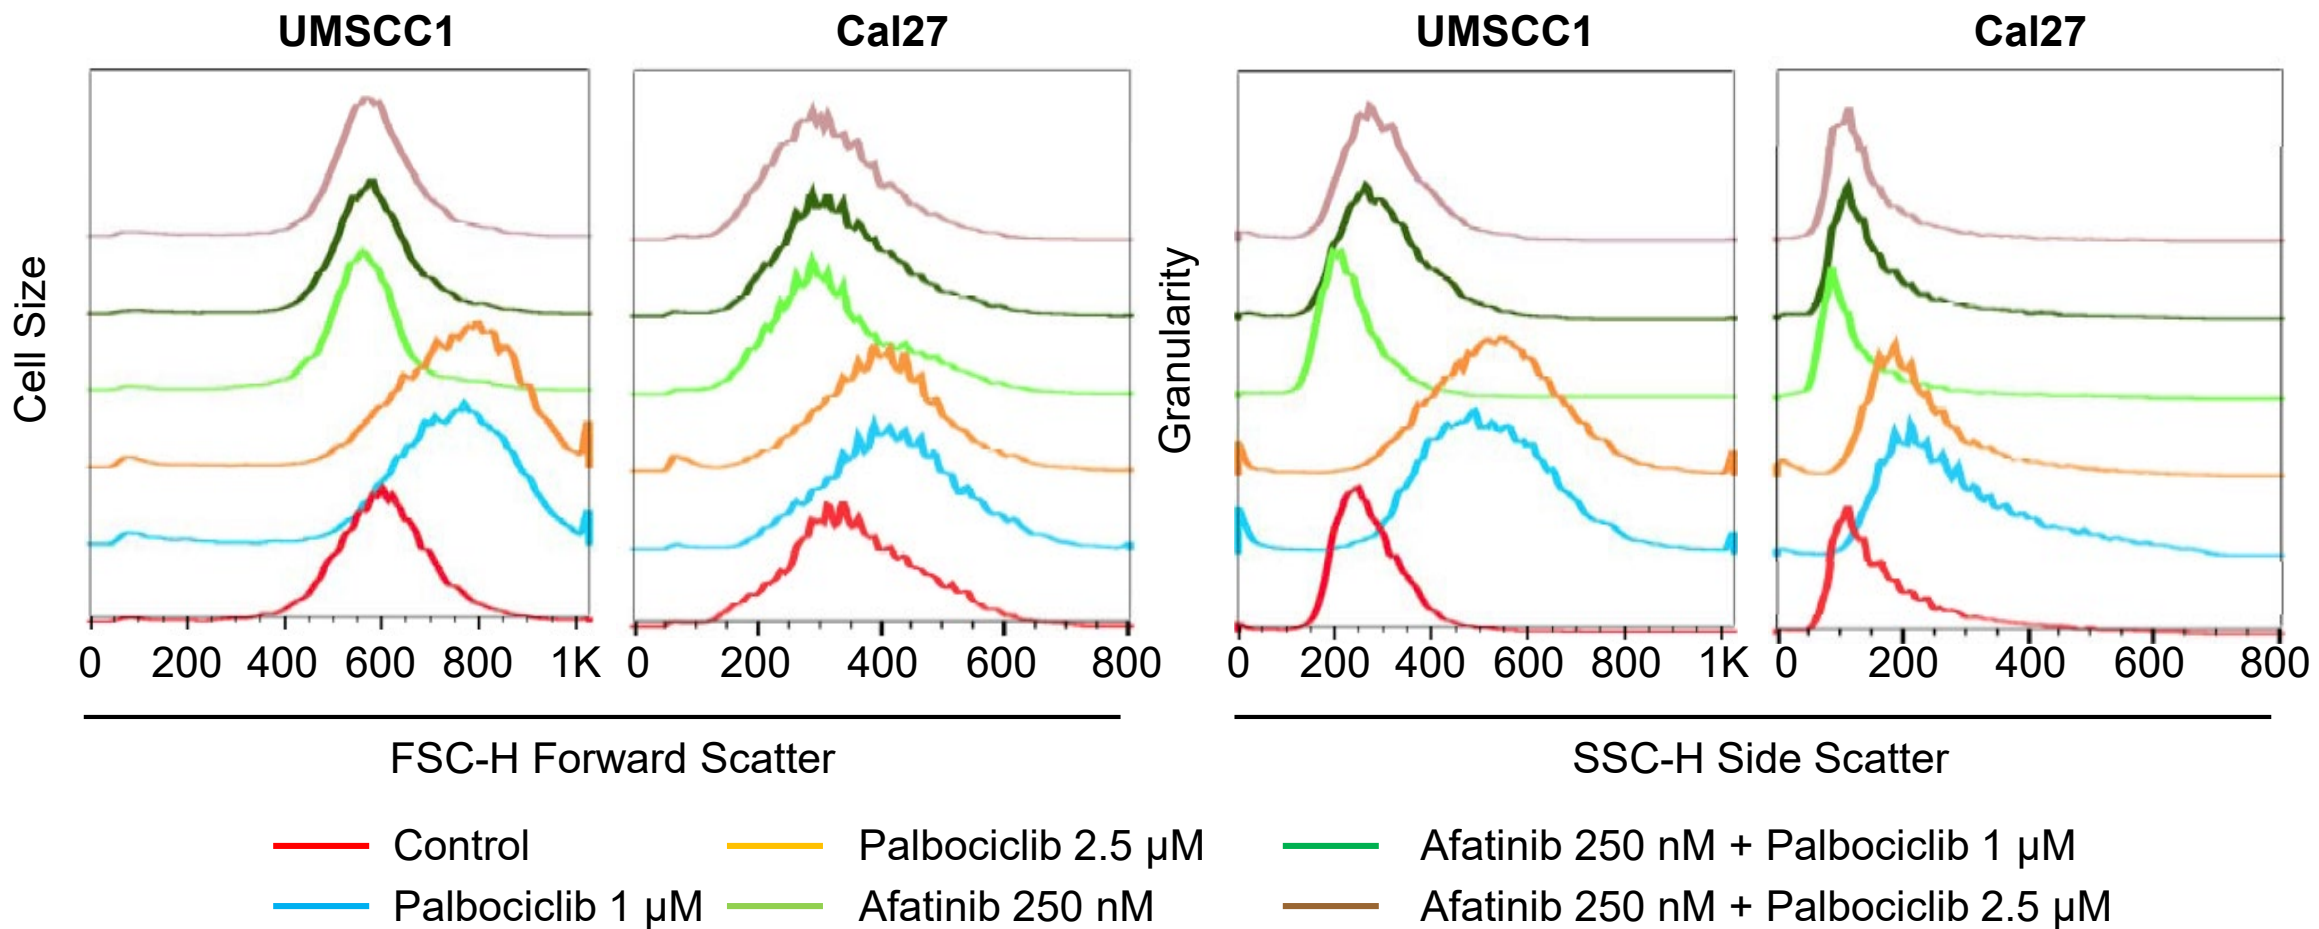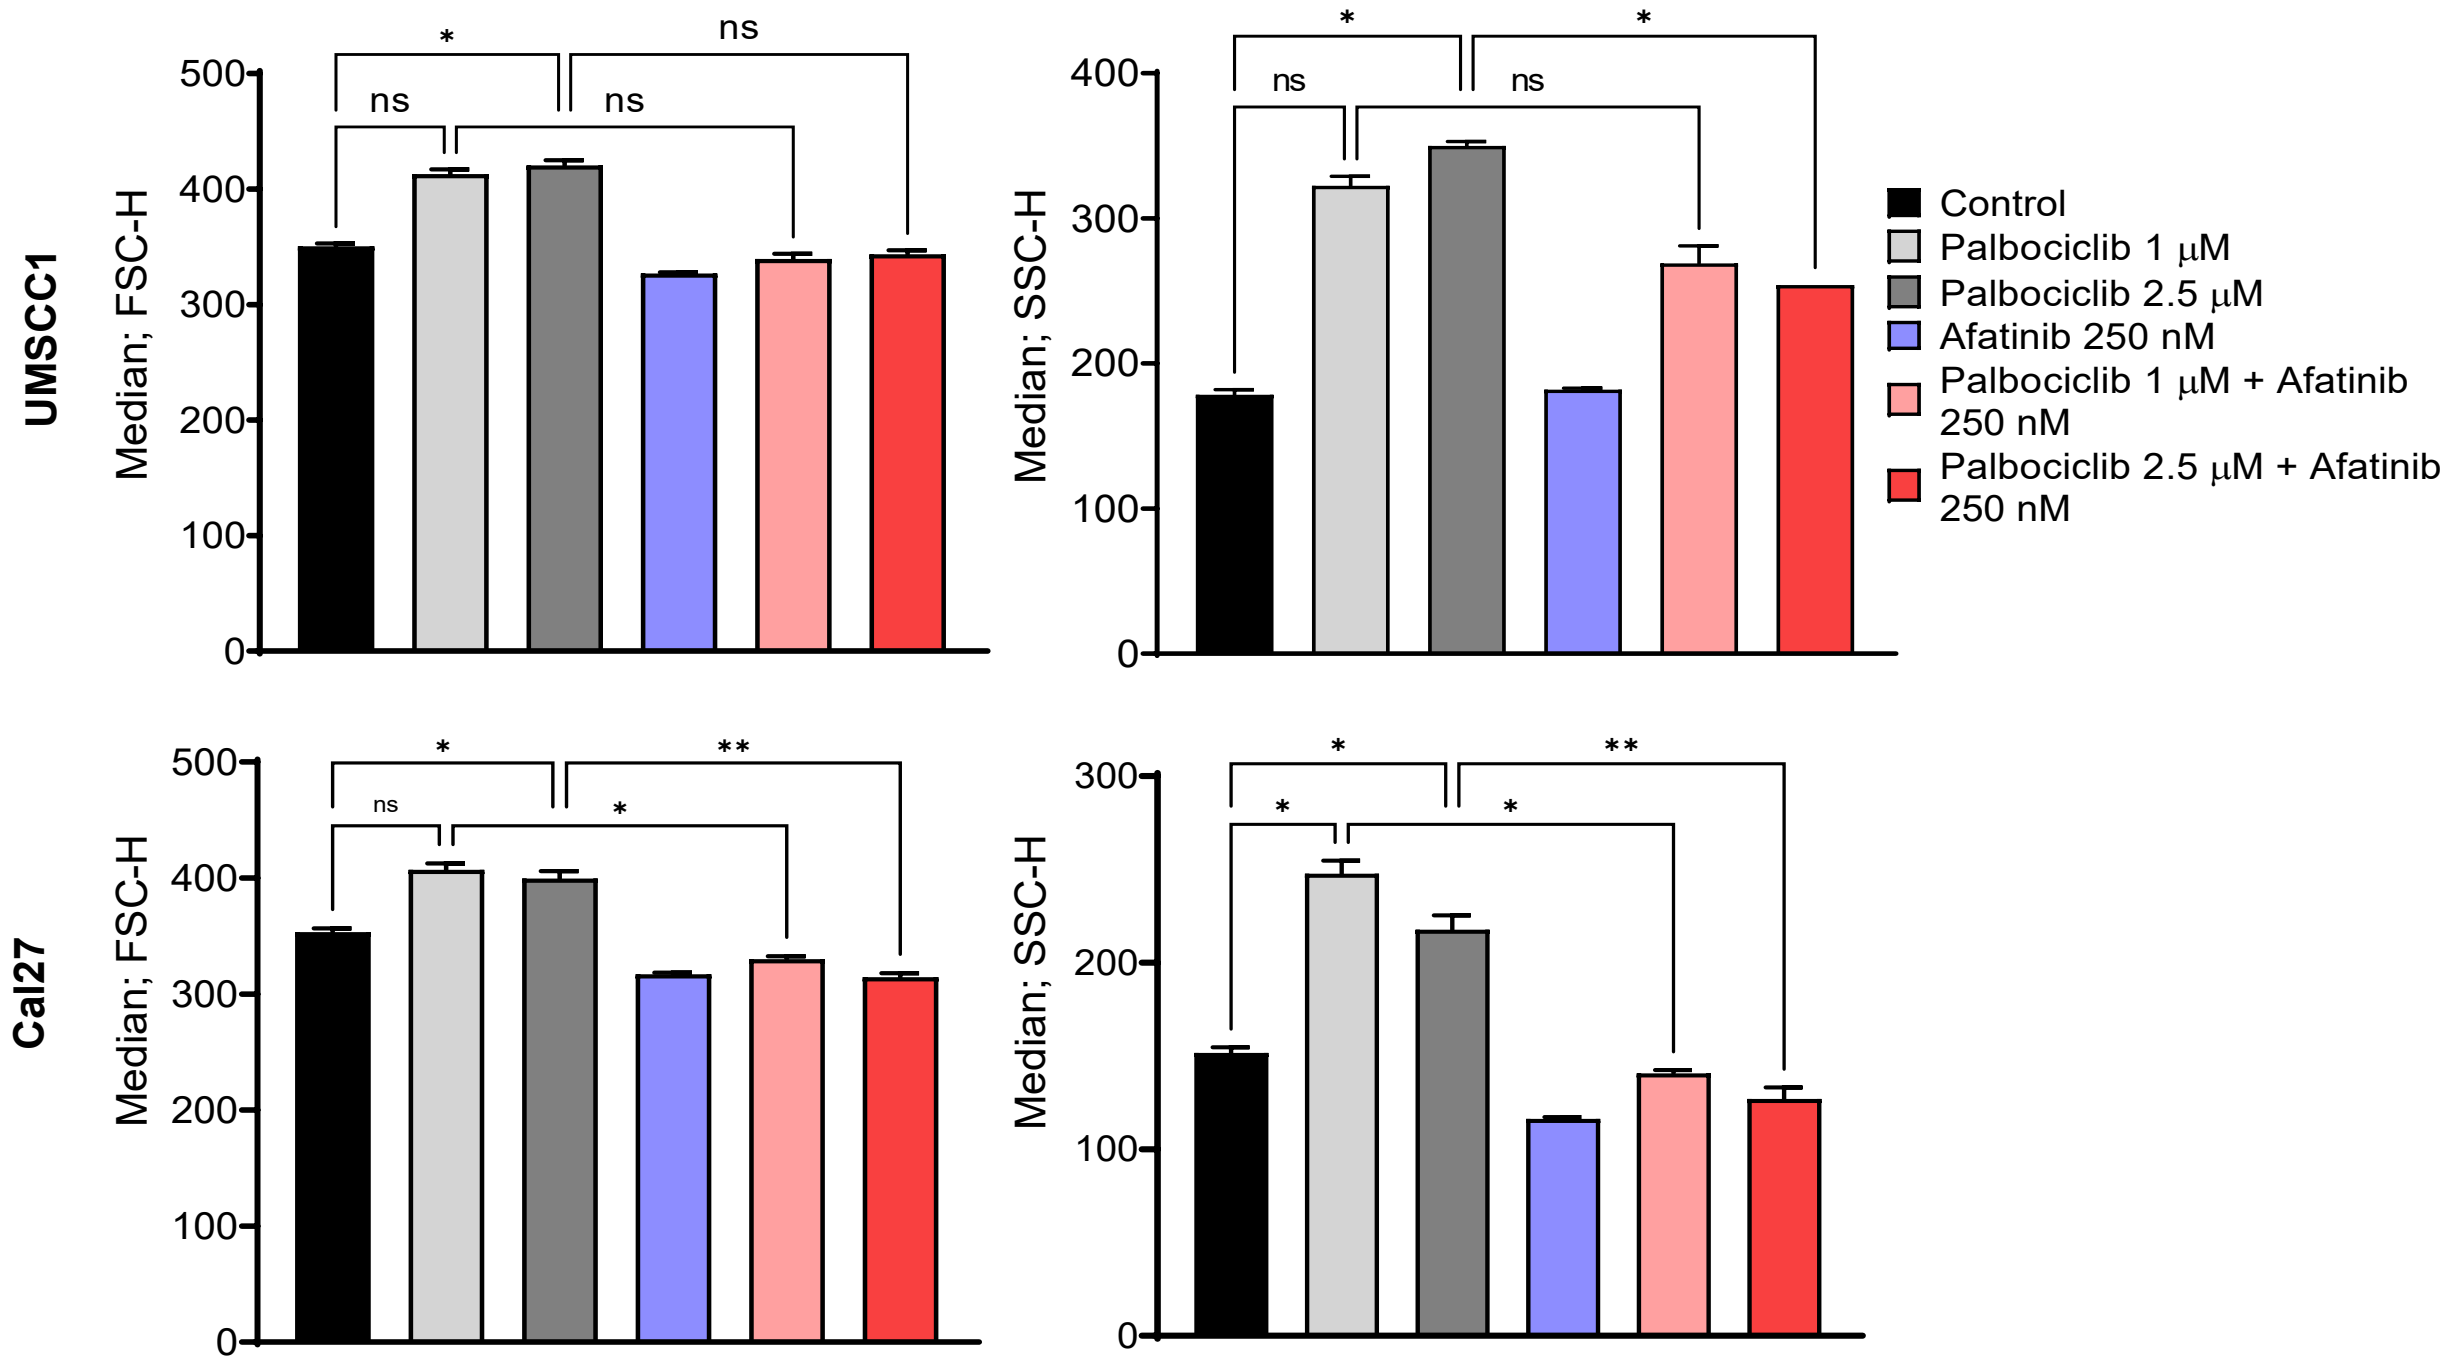

Supplement: NIHMS1700660-supplement-5.pdf [file NIHMS1700660-supplement-5.pdf]

# Supplementary Figure S6

**A**

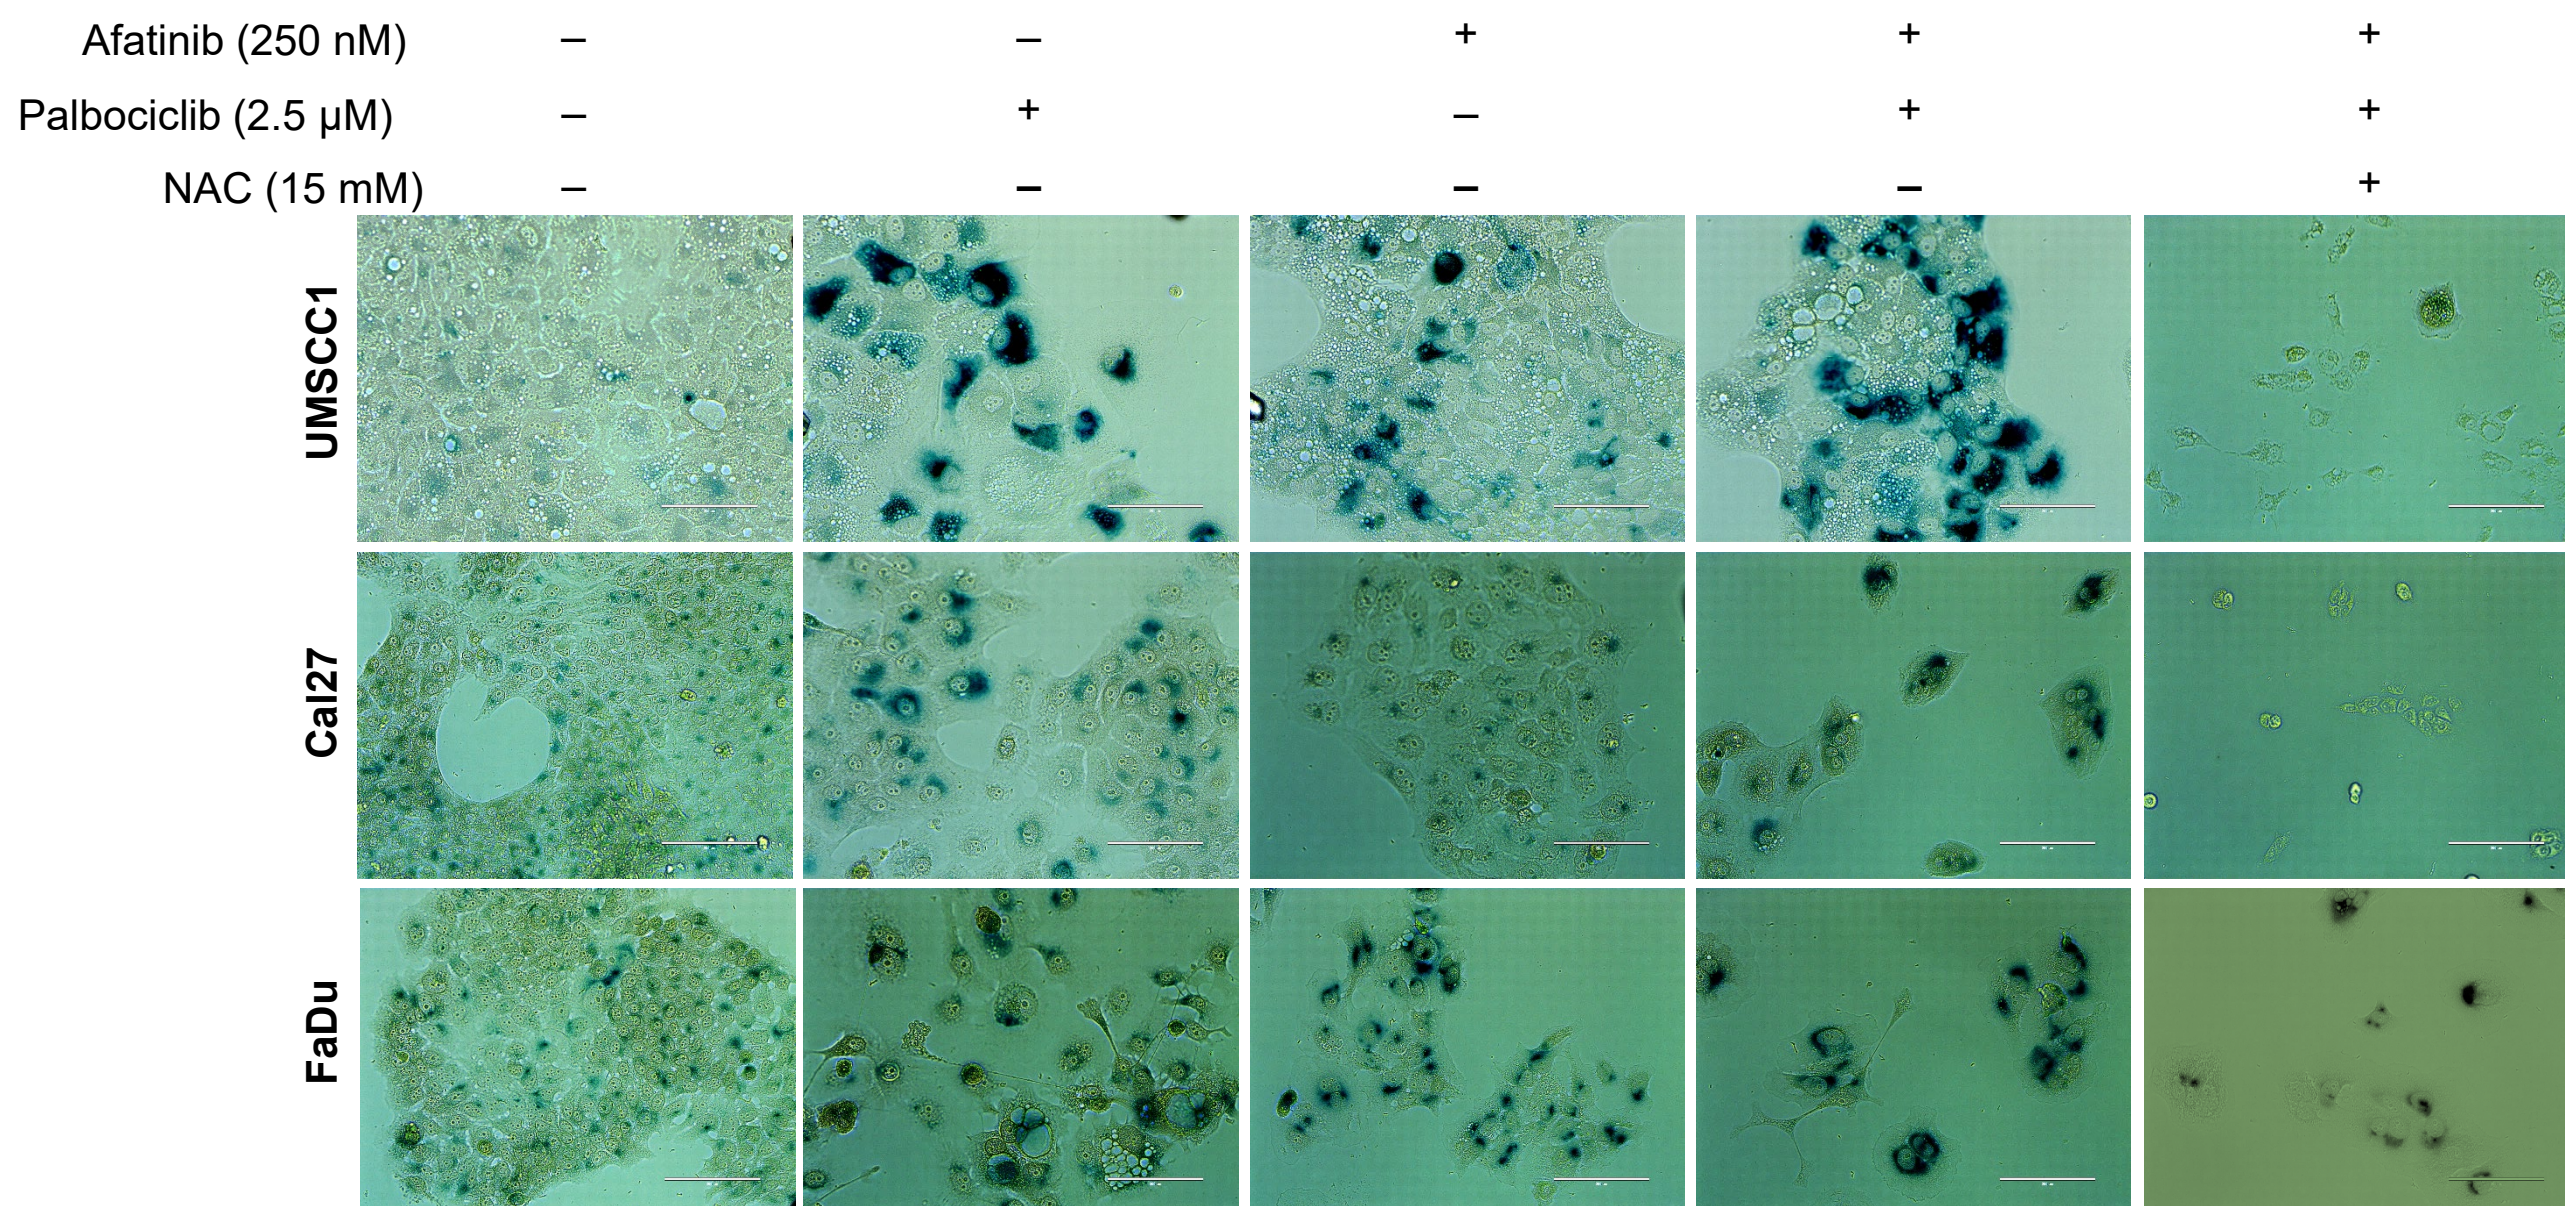

**B**

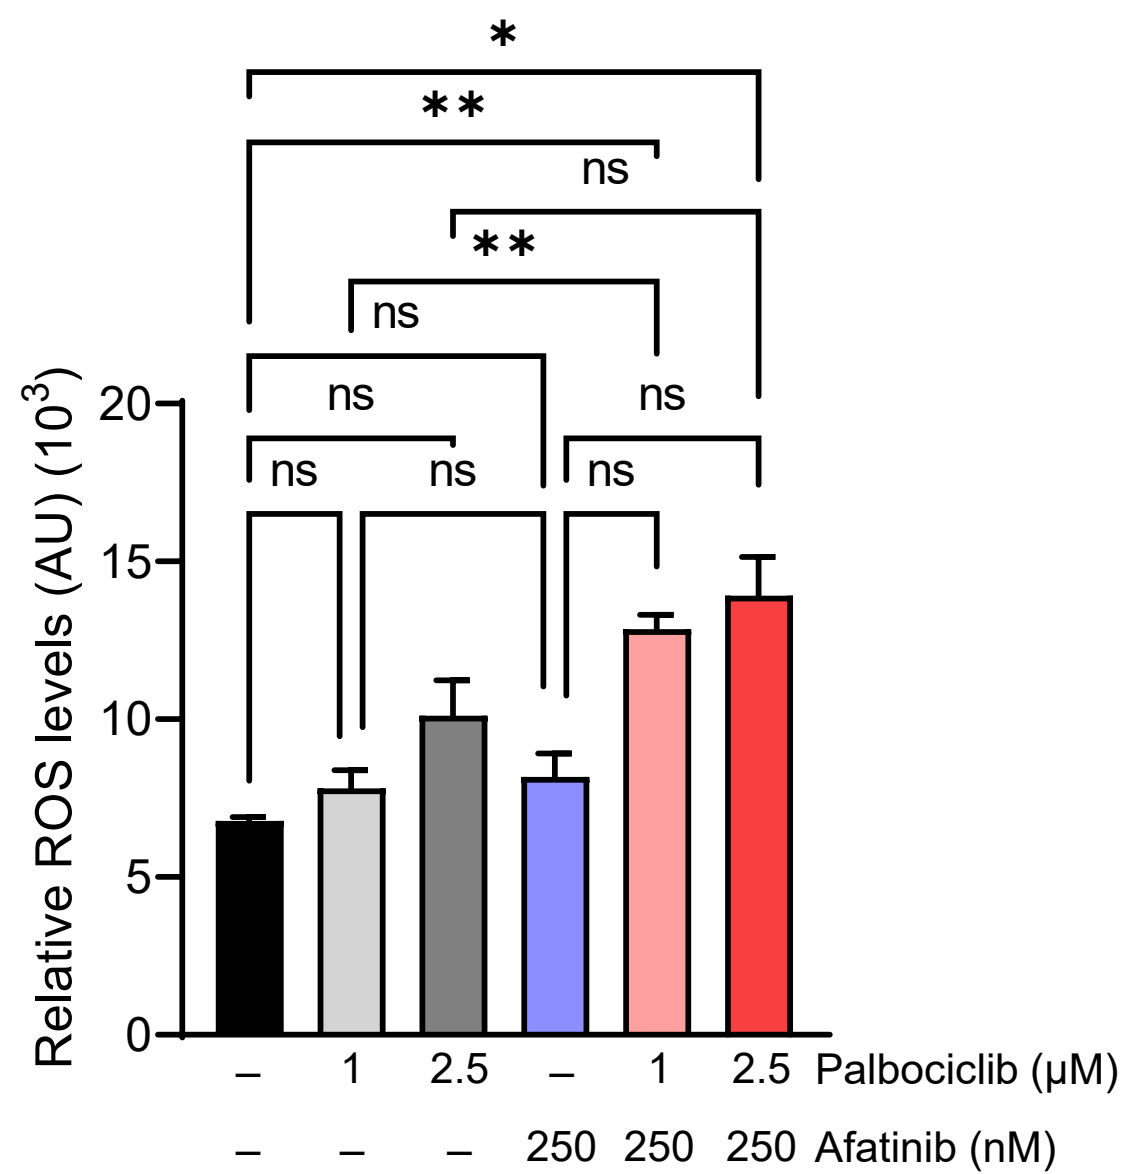

Supplement: NIHMS1700660-supplement-6.pdf [file NIHMS1700660-supplement-6.pdf]
